# Supplementary material
Source: Research Square preprint supplement (doi:10.21203/rs.3.rs-9201296/v1)
Supplement: Supplementary file 1 [file 357392f1fdfbeb9ecf99d166.docx]

# The Sampled Videos

| Name | Frame | Specific message strategy |
| --- | --- | --- |
| The Real Cost | WTQ | Emotions, graphics, familiar chemical terms - Fear/disgust of health and vaping (Wu et al., 2024) |
| Generation Free | WTQ | Narratives, storytelling - Risk of addiction and vaping according to older teenagers (Wu et al., 2024) |
| Do you know what you are vaping? | WTQ | Uncertainty, graphics - unknown chemicals in vape and consequences on health (Zhou et al., 2022) |
| 5 tips to help you quit vaping | HTQ | Narrative - How to quit (Davis et al., 2013) |

##### About the videos and who published them

**The Real Cost** is a comprehensive anti-tobacco campaign financed by the US Food and Drugs Administration (FDA). The campaign started in 2014 and has been running for a decade. It’s effect has been measured and found to have had a large impact on teenagers and their intention to start smoking/vaping in the US (Noar et al., 2018).

**Generation Free (Original Norwegian title: Generasjon Fri)** is an anti-tobacco campaign launched in 2024 financed by the Norwegian Directorate of Health. Generation Free was evaluated through surveys and was considered a success in reaching the targeted audience.

**Do you know what you are vaping?** is a campaign financed by the Southwest Cancer Society of Australia.

**5 tips to help you quit vaping** - Headspace is Australia’s National Youth Mental Health Foundation, providing early intervention mental health services to 12–25-year-olds.

##### Location URLs of videos January 2026

| 1 | The Real Cost – FDA – USA <https://www.youtube.com/watch?v=GM16gGQxPBU&pp=ygUddGhlIHJlYWwgY29zdCB2YXBlIGNvbW1lcmNpYWw%3D> |
| --- | --- |
| 2 | Generation Free (Generasjon Fri, original Norwegian name) – Norwegian Health Authorities - Norway - <https://youtu.be/koNue3MkyuM> |
| 3 | Do you know what you are vaping? – Cancer Institute NSW – Australia - <https://www.cancer.nsw.gov.au/prevention-and-screening/preventing-cancer/campaigns/vaping/do-you-know-what-you-re-vaping> |
| 4 | 5 tips to help you quit vaping - Headspace - Australia’s National Youth Mental Health Foundation - Australia  <https://youtube.com/shorts/MzsQCKJ4q7E?si=bGldb8rWk_Hn2Xmx> |

Davis, K. C., Nonnemaker, J., Duke, J., & Farrelly, M. C. (2013). Perceived Effectiveness of Cessation Advertisements: The Importance of Audience Reactions and Practical Implications for Media Campaign Planning. *Health Communication*, *28*(5), 461-472. <https://doi.org/10.1080/10410236.2012.696535>

Noar, S. M., Bell, T., Kelley, D., Barker, J., & Yzer, M. (2018). Perceived Message Effectiveness Measures in Tobacco Education Campaigns: A Systematic Review. *Communication Methods and Measures*, *12*(4), 295-313. <https://doi.org/10.1080/19312458.2018.1483017>

Wu, J., Benjamin, E. J., Ross, J. C., Fetterman, J. L., & Hong, T. (2024). Health Messaging Strategies for Vaping Prevention and Cessation Among Youth and Young Adults: A Systematic Review. *Health Communication*, 1-19. <https://doi.org/10.1080/10410236.2024.2352284>

Zhou, W., He, L., Nie, X., Wuri, T., Piao, J., Chen, D., Gao, H., Liu, J., Tubden, K., He, M., & He, J. (2022). Accuracy and Timeliness of Knowledge Dissemination on COVID-19 Among People in Rural and Remote Regions of China at the Early Stage of Outbreak [Article]. *FRONTIERS IN PUBLIC HEALTH*, *9*, Article 554038. <https://doi.org/10.3389/fpubh.2021.554038>
