# Supplementary material
Source: Research Square preprint supplement (doi:10.21203/rs.3.rs-9201296/v1)
Supplement: Supplementary file 2 [file b622c0998d6ec5ac36c22057.docx]

**Interview Guide translated to English**

🎧 Short interview guide – Youth 13–14 years
Theme: Young people’s experiences of information and health videos
Method: Individual, semi-structured interviews (qualitative)
Frameworks:
• TENK: Trust, Emotions, Narratives, Creativity
• PE (Perceived Effectiveness): Worth remembering, Grabbed attention, Powerful, Informative, Meaningful, Convincing

The four videos selected are:
The Real Cost – FDA – USA - <https://www.youtube.com/watch?v=GM16gGQxPBU&pp=ygUddGhlIHJlYWwgY29zdCB2YXBlIGNvbW1lcmNpYWw%3D>
Generasjon FRI (Generation Free, translated by author) – Norwegian Health Authorities, Norway - <https://youtu.be/koNue3MkyuM>
Do you know what you are vaping? – Cancer Institute NSW – Australia - <https://www.cancer.nsw.gov.au/prevention-and-screening/preventing-cancer/campaigns/vaping/do-you-know-what-you-re-vaping>
Quit your way out - NHS Greater Glasgow and Clyde - UK
<https://youtu.be/lFUi3TZKKr4?si=bWdJbmxTD6CiA9Pt>

Getting to know you
• Tell me a little about yourself (very briefly).
• Remember there are no right or wrong answers. We want to hear what YOU think.
• How old are you? What do your parents do for work?
• I will not share this answer with anyone else—you are anonymous in the research article, and I will only report the total number of vapers/non-vapers.
• Do you vape?
• When you hear the word “vaping,” what do you think of?
• Have you seen those “don’t vape” things before? Where? (Snap, TikTok, school, ads, etc.)

🗣️ Short interview guide for youth (13–14 years)
Purpose: To find out what young people think and feel when they watch videos from, for example, health authorities or campaigns.
Frameworks:
• TENK: Trust – Emotions – Narratives – Creativity
• PE: Attention – Memorability – Power – Information – Meaning – Persuasion

🎥 Show the first video

🟡 1. First impressions and what grabs you
(TENK: Creativity / PE: Attention, Memorability)
• What stood out the most to you in the video?
• Was there anything that made you stop or feel curious?
• Is there anything you remember especially well from the video?

🔵 2. Trust and credibility
(TENK: Trust / PE: Persuasion) – thinking about the motive
• Who do you think made the video?
• Do you trust what they’re saying? Why or why not?
• Does the video feel honest, or does it feel more like it’s trying to make you feel a certain way?

🔴 3. Feelings and impressions
(TENK: Emotions / PE: Power)
• How did you feel while watching the video?
• Did anything make you sad, happy, angry, inspired—or maybe nothing at all?
• What in the video made the strongest impression on you (music, images, people, words)?

🟢 4. Story and meaning
(TENK: Narratives / PE: Meaning)
• What is the video about, as you see it?
• Did you recognize yourself in the people or situations in the video?
• What do you think they’re really trying to say with the video?

🟣 5. Facts and learning
(TENK: Trust / PE: Information)
• Did you learn anything new from the video?
• Was it easy to understand what it was trying to explain?
• Do you think the video gave more facts or more feelings?

🟠 6. What it makes you want to do
(TENK: Narratives + Creativity / PE: Meaning, Persuasion)
• Did the video make you think you should do something—or not? (PE)
• Did it give you any ideas about what you could actually do?
• Did it make you want to find out more, or talk to someone about the topic?

⚫ 7. Sharing and social media
(TENK: Creativity / PE: Memorability, Power)
• Would you share this video with friends? Why or why not?
• Where would you share it—TikTok, Snap, Insta, YouTube, or somewhere else?
• Do you think the way they talk fits young people?

⚪ 8. Reaching different groups
(TENK: Narratives + Emotions / PE: Meaning)
• Do you think it fits both people who vape and those who don’t?
• Did you see yourself in the people featured in the video?
• Do you think anyone might feel left out or negatively targeted?
• What could make the video more relevant to you and people you know?

➡️ Show the next video and go back to point 1. Repeat for each video.

🧭 9. Finally
(Summary across TENK + PE)
• What are you left with after watching the videos?
• What did you like best—and least?
• If you could give one piece of advice to the people making these videos, what would you say?

Added after the first interview:
Would you prefer to hear about negative consequences if you don’t quit,
or positive consequences if you do quit?

Would you rather have facts or feelings?

Would you like to know why one should avoid/quit, or would you rather hear how to quit?

Have we talked about these frames:
What is the problem?
What is the evaluation of it?
What is the solution?

Do you think the videos work?

**Norwegian version**

**🎧 Kort intervjuguide – Ungdom 13–14 år**

**Tema:** Ungdoms opplevelser av informasjons- og helsevideoer
**Metode:** Individuelle, semi-strukturerte intervju (kvalitativt)
**Rammeverk:**

- **TENK:** Tillit, Emosjoner, Narrativer, Kreativitet
- **PE (Perceived Effectiveness):** Worth remembering, Grabbed attention, Powerful, Informative, Meaningful, Convincing

The four videos selected are:

The Real Cost – FDA – USA - <https://www.youtube.com/watch?v=GM16gGQxPBU&pp=ygUddGhlIHJlYWwgY29zdCB2YXBlIGNvbW1lcmNpYWw%3D>

Generasjon FRI (Generation Free, translated by author) – Norwegian Health Authorities, Norway - <https://youtu.be/koNue3MkyuM>

Do you know what you are vaping? – Cancer Institute NSW – Australia - <https://www.cancer.nsw.gov.au/prevention-and-screening/preventing-cancer/campaigns/vaping/do-you-know-what-you-re-vaping>

Quit your way out - NHS Greater Glascow and Clyde - UK

<https://youtu.be/lFUi3TZKKr4?si=bWdJbmxTD6CiA9Pt>

**Bli kjent**

- **Fortell litt om deg selv (helt kort).**
- **Husk det er ingen riktige eller feile svar. Vi vil høre hva DU tenker**
- **Hvor gammel er du? Hva jobber foreldrene dine med?**
- **Jeg vil ikke dele dette svaret med noen andre - du er anonym i forskningsartikkelen og jeg vil kun oppgi totalt antall vapere/ikke-vapere**
- **Vaper du?**
- **Når du hører ordet “vaping” – hva tenker du på da?**
- **Har du sett sånne “ikke vape”-ting før? Hvor? (Snap, TikTok, skole, reklame osv.)**

**🗣️ Kort intervjuguide for ungdom (13–14 år)**

**Formål:** Finne ut hva ungdom tenker og føler når de ser videoer fra f.eks. helsemyndigheter eller kampanjer.
**Rammeverk:**

- **TENK:** Tillit – Emosjoner – Narrativer – Kreativitet
- **PE:** Oppmerksomhet – Minneverdighet – Kraft – Informasjon – Mening – Overbevisning

**🎥 Vis første video**

**🟡 1. Førsteinntrykk og hva som fanger deg**

*(TENK: Kreativitet / PE: Oppmerksomhet, Minneverdighet)*

- Hva la du mest merke til i videoen?
- Var det noe som gjorde at du stoppet opp eller ble nysgjerrig?
- Er det noe du husker ekstra godt fra videoen?

**🔵 2. Tillit og troverdighet**

*(TENK: Tillit / PE: Overbevisning) – med tanke på hva motivet er*

- Hvem tror du har laget videoen?
- Stoler du på det de sier? Hvorfor eller hvorfor ikke?
- Føles videoen ærlig, eller prøver den mer å få deg til å føle noe bestemt?

**🔴 3. Følelser og inntrykk**

*(TENK: Emosjoner / PE: Kraft)*

- Hva følte du da du så videoen?
- Var det noe som gjorde deg trist, glad, sint, inspirert – eller kanskje ingenting?
- Hva i videoen gjorde mest inntrykk på deg (musikk, bilder, personer, ord)?

**🟢 4. Historie og mening**

*(TENK: Narrativer / PE: Mening)*

- Hva handler videoen om, slik du ser det?
- Kjente du deg igjen i folkene eller situasjonen i videoen?
- Hva tror du de egentlig prøver å si med videoen?

**🟣 5. Fakta og læring**

*(TENK: Tillit / PE: Informasjon)*

- Lærte du noe nytt av videoen?
- Var det lett å forstå hva den prøvde å forklare?
- Synes du videoen ga mer fakta eller mer følelser?

**🟠 6. Hva du får lyst til å gjøre**

*(TENK: Narrativer + Kreativitet / PE: Mening, Overbevisning)*

- Fikk videoen deg til å tenke at du burde gjøre noe – eller ikke? (PE)
- Gav den deg noen ideer om hva du faktisk kan gjøre?
- Fikk du lyst til å finne ut mer, eller snakke med noen om temaet?

**⚫ 7. Deling og sosiale medier**

*(TENK: Kreativitet / PE: Minneverdighet, Kraft)*

- Ville du delt denne videoen med venner? Hvorfor eller hvorfor ikke?
- Hvor ville du delt den – TikTok, Snap, Insta, YouTube, eller et annet sted?
- Passer måten de snakker på for ungdom, synes du?

**⚪ 8. Treff på ulike grupper**

*(TENK: Narrativer + Emosjoner / PE: Mening)*

- Tror du den passer både til de som vaper og de som ikke vaper?
- Følte du deg igjen i folkene som var med i videoen?
- Tror du noen kunne følt seg utenfor eller truffet på en dårlig måte?
- Hva kunne gjort videoen mer relevant for deg og folk du kjenner?

**➡️ Vis neste video og gå tilbake til punkt 1. Gjenta for hver video.**

**🧭 9. Til slutt**

*(Oppsummering på tvers av TENK + PE)*

- Hva sitter du igjen med etter å ha sett videoen?
- Hva likte du best – og hva likte du minst?
- Hvis du kunne gitt ett råd til de som lager slike videoer, hva ville du sagt?

Lagt til etter første intervju:

Ville du ha valgt å høre om negative konsekvenser hvis du ikke sluttet

Eller positive konsekvenser hvis de slutter?

Vil du ha fakta eller følelser?

Vil du vite hvorfor man burde unngå/slutte eller vil du høre hvordan man slutter?

Har vi snakket om disse rammene:

Hva er problemer

Hva er vurderingen av det

Hva er løsningen?

Tror du at videoene virker?
