# Supplementary material
Source: Research Square preprint supplement (doi:10.21203/rs.3.rs-9201296/v1)
Supplement: Supplementary file 3 [file c771efd33fdee1c92f684a2e.docx]

# Overview of quotes in original Norwegian language

Q1:

- For å si det sånn, at tror ikke jeg hadde delt den med venner. For det er liksom, man kan godt si til folk at det ikke er bra å vape det, men det er noe med å sende sånne ting. Og så gjør jo folk det ofte fordi dem har det vanskelig. Og i hvert fall vennene mine, gjør det for dem har det vanskelig ikke, at de liksom vil se kul ut.

B: At de vaper fordi de har det vanskelig?

- Ja.

B: Så derfor vil du ikke sende en video, for då vil de føle seg dårligere på en måte?

- Ja, det er jo ofte, eller alle de som vaper har jo skilte foreldre, så de har liksom de problemer med det, og tror de har det litt vanskelig med det. Så jeg ville jo liksom ikke sendt det for jeg vet at det kan bli såret på det.

Q2:

Jeg vet ikke, bare noen som prøvde virkelig å få fram at vaping burde ikke startet med? Jeg vet ikke helt hvem det skulle vært.

Q3:

Jeg tror det bare er en dude på YouTube.

Q4:

Unge voksne.

Q5:

B: Og du føler at du kan stole på den?

- Mm. Jeg vet ikke helt, har aldri hørt at det er liksom abstrakton(aceton), eller hva det var i vape, har jeg liksom ikke hørt. Jeg har hørt at det er nikotin og sånn, jeg husker ikke hva det andre heter, men sånn til å gjøre sånn at det blir til damp. Men jeg har ikke hørt at det er sånn neglelakk. Så hadde jeg sikkert, hvis jeg hadde vært hjemme og hatt den her, så hadde jeg sikkert tatt telefonen fram og søkt det opp. For sånn å dobbelsjekke

Q6:

Jeg vet egentlig ikke. Ja. Fordi de brukte faglige ord. Det er noe med hvordan en ser ut. som kan få deg til å stole på den. Den så faglig ut.

Q7:

B: Tror du at du kan stole på dem?

- Ja. Det så veldig ordentlig ut.

B: Fordi den var ordentlig laget?

- Det var ikke noe tull.

B: Du var usikker på om de overdrev.

- Nei, altså det med et virus da. Så de visste liksom på utsida. Det er jo ikke helt sant da.

B: Nei, nei. Med noen som du kan stole på?

- Ja

Q8:

Du fikk jo mer lyst til å ikke vape når ungdommen sa det selv, på en måte. Litt sånn. Så jeg liker det at de har ungdommen som sier det. Det er litt bedre enn at en voksen mann står og snakker om det. Men at det er veldig bra at de har ungdommer, kanskje til og med yngre ungdommer er enda bedre.

Q9:

B: Gav det mer fakta eller mer følelser?

- Den ga meg begge deler. Det gav meg fakta for at jeg skulle kunne slutte, men de prøvde å si til meg at det er helt ok, begynne igjen og ta pause og masse sånt.

Q11:

B: Hvis de skulle gjøre det mer relevant for deg, hva skulle de ha gjort?

- Litt det samme som sist. Forklare litt mer om tingene som kan være i det. Forklarte litt ordentlig hva det kan være. Sånn som de gjorde her, at de sa at det er det samme kjemikalet som det er i sånne neglelakkfjernere. I stedet for å bare si hva kjemikalet er, for det er ikke ordentlig jeg vet hva det er. Forklart på en litt enkel måte, sånn at ungdommen også kan skjønne det på hva skadene kan gjøre, og hvordan det kan påvirke deg og hva nikotin kan gjøre med en hjerne under utvikling og sånne ting.

Q15:

Det er liksom, det er ikke sånn, du må gjøre så mye, du må bare få cash, og det er kanskje det ganske vanskeligste.
